# Supplementary material
Source: PubMed Central journal article supplement (PMC10022527)
Supplement: NIHMS1804787-supplement-Supplementary_Information.pdf [file NIHMS1804787-supplement-Supplementary_Information.pdf]

**Supplementary information**

---

**Behavioural immune landscapes of  
inflammation**

---

In the format provided by the  
authors and unedited

# Supplementary Information

## Behavioral immune landscapes of inflammation

Georgiana Crainiciuc, Miguel Palomino-Segura, Miguel Molina-Moreno, Jon Sicilia, David G. Aragonés, Jackson LiangYao Li, Rodrigo Madurga, José M. Adrover, Alejandra Aroca-Crevillén, Sandra Martin-Salamanca, Alfonso Serrano del Valle, Sandra D. Castillo, Heidi Welch, Oliver Soenhlein, Mariona Graupera, Fátima Sánchez-Cabo, Alexander Zarbock, Thomas E. Smithgall, Mauro Di Pilato, Thorsten R. Mempel, Pierre-Louis Tharaux, Santiago F. González, Angel Ayuso-Sacido, Lai Guan Ng, Gabriel F. Calvo, Iván González-Díaz, Fernando Díaz-de-María and Andrés Hidalgo.

Correspondence to: [ahidalgo@cnic.es](mailto:ahidalgo@cnic.es)

### **This PDF file includes:**

- Table S1: [List of mouse strains used in the behavioral screening](#) (page 2)
- Table S2: [Imaging parameters](#) (page 3)
- Table S3: [Summary of imaging acquisition and data analysis workflows](#) (page 4)
- Table S4: [General analytical workflow and modules for the imaging datasets](#) (page 5)
- Table S5: [List and ranking of image-extracted parameters](#) (pages 6-24)

### **Other Supplementary Materials:**

- Captions for Videos S1 to S6 (page 25)

**Supplementary Table 1. List of mouse strains used in the behavioral screening**

| <b>Gene</b>                                                 | <b>Protein</b> | <b>Mutation</b> | <b>Driver</b> | <b>Specificity</b> | <b>Strain</b> | <b>Source</b>              |
|-------------------------------------------------------------|----------------|-----------------|---------------|--------------------|---------------|----------------------------|
| <i>Selplg</i> <sup>-/-</sup>                                | PSGL1          | KO              | --            | Not sp.            | C57BL/6       | Hidalgo (CNIC)             |
| <i>Fpr1</i> <sup>-/-</sup>                                  | <i>Fpr1</i>    | KO              | --            | Not sp.            | C57BL/6       | Soehnlein (U Münster)      |
| <i>Fcrg</i> /<br><i>Dap12</i> <sup>-/-</sup>                | FcγR/<br>DAP12 | KO              | --            | Not sp.            | C57BL/6       | Zarbock (U Münster)        |
| <i>Cxcr2</i> <sup>ΔN</sup> /<br><i>Cxcr2</i> <sup>-/-</sup> | CXCR2          | Floxed/<br>KO   | Mrp8-Cre      | Neu /<br>Not sp.   | C57BL/6       | C. Weber (LMU)             |
| <i>Fgr</i> <sup>-/-</sup>                                   | Fgr            | KO              | --            | Not sp.            | C57BL/6       | J.A. Enríquez (CNIC)       |
| <i>Rap1a</i> <sup>ΔM</sup>                                  | Rap1           | Floxed          | LysM-Cre      | Myeloid            | C57BL/6       | Zarbock (U Münster)        |
| <i>Prex1/2</i> <sup>-/-</sup>                               | Prex           | KO              | --            | Not sp.            | C57BL/6       | Welch (Babraham)           |
| <i>Rac1</i> <sup>ΔM</sup>                                   | Rac1           | KO              | LysM-Cre      | Myeloid            | C57BL/6       | Zarbock (U Münster)        |
| <i>Dap12</i> <sup>-/-</sup>                                 | Dap12          | KO              | --            | Not sp.            | C57BL/6       | Zarbock (U Münster)        |
| <i>Pik3cb</i> <sup>KD/+</sup>                               | PI3Kβ          | Kinase Dead     | --            | Not sp.            | C57BL/6       | Graupera (IJC)             |
| <i>Fpr2</i> <sup>-/-</sup>                                  | Fpr2           | KO              | --            | Not sp.            | C57BL/6       | Soehnlein (U Münster)      |
| <i>Hck</i> <sup>-/-</sup>                                   | Hck            | KO              | --            | Not sp.            | C57BL/6       | A. Mocsai (Simmelweis)     |
| <i>Fcrg</i> <sup>-/-</sup>                                  | FcγR           | KO              | --            | Not sp.            | C57BL/6       | Zarbock (U Münster)        |
| <i>Lyn</i> <sup>-/-</sup>                                   | Lyn            | KO              | --            | Not sp.            | C57BL/6       | A. Mocsai (Simmelweis)     |
| <i>Syk</i> <sup>ΔN</sup>                                    | Syk            | Floxed          | Mrp8-Cre      | Neu                | C57BL/6       | Hidalgo (CNIC)             |
| <i>Cxcr4</i> <sup>ΔN</sup>                                  | CXCR4          | Floxed          | Mrp8-Cre      | Neu                | C57BL/6       | Hidalgo (CNIC)             |
| <i>Btk</i> <sup>-/-</sup>                                   | Btk            | KO              | --            | Not sp.            | C57BL/6       | R.W. Hendriks (Erasmus MC) |
| <i>Mapk13</i> <sup>-/-</sup>                                | P38δ           | KO              | --            | Not sp.            | C57BL/6       | G. Sabio (CNIC)            |
| <i>Rac2</i> <sup>-/-</sup>                                  | Rac2           | KO              | --            | Not sp.            | C57BL/6       | Welch (Babraham)           |
| <i>Cdc42</i> <sup>ΔM</sup>                                  | Cdc42          | Floxed          | LysM-Cre      | Myeloid            | C57BL/6       | Zarbock (U Münster)        |
| <i>Mapk14</i> <sup>-/-</sup>                                | P38γ           | KO              | --            | Not sp.            | C57BL/6       | G. Sabio (CNIC)            |
| <i>Pik3cd</i> <sup>KD/KD</sup>                              | PI3Kδ          | Kinase Dead     | --            | Not sp.            | C57BL/6       | Graupera (IJC)             |
| <i>Pik3cg</i> <sup>KD/KD</sup>                              | PI3Kγ          | Kinase Dead     | --            | Not sp.            | C57BL/6       | E. Hirsch (U Torino)       |
| <i>Mst1</i> <sup>-/-</sup>                                  | Mst1           | KO              | --            | Not sp.            | C57BL/6       | M. Sperandio (LMU Munich)  |
| <i>Tnfr</i> <sup>-/-</sup>                                  | TNFR           | KO              | --            | Not sp.            | C57BL/6       | Soehnlein (U Münster)      |

IJC, Insitute Josep Carreras; LMU, Ludwig-Maximilians University  
Not sp, not specific; Neu, neutrophil-specific

**Supplementary Table 2. Imaging parameters**

|                                     |       |
|-------------------------------------|-------|
| <b>Influenza-infected trachea</b>   |       |
| Microns per pixel ( $\mu\text{m}$ ) | 0.854 |
| Step Size (Z)( $\mu\text{m}$ )      | 3     |
| Total Z ( $\mu\text{m}$ )           | 54    |
| Scan frequency (sec)                | 30    |
| total time (hh:mm)                  | 00:30 |
| <b>Laser burn injury (skin)</b>     |       |
| Microns per pixel ( $\mu\text{m}$ ) | 0.87  |
| Step Size (Z)( $\mu\text{m}$ )      | 4     |
| Total Z ( $\mu\text{m}$ )           | 44    |
| Scan frequency (sec)                | 60    |
| total time (hh:mm)                  | 02:33 |
| <b>Ischemia/reperfusion (skin)</b>  |       |
| Microns per pixel ( $\mu\text{m}$ ) | 0.99  |
| Step Size (Z)( $\mu\text{m}$ )      | 4     |
| Total Z ( $\mu\text{m}$ )           | 84    |
| Scan frequency (sec)                | 300   |
| total time (hh:mm)                  | 02:55 |
| <b>Cremaster muscle</b>             |       |
| Microns per pixel ( $\mu\text{m}$ ) | 0.667 |
| Step Size (Z)( $\mu\text{m}$ )      | 2     |
| Total Z ( $\mu\text{m}$ )           | 26    |
| Scan frequency (sec)                | 8.8   |
| total time (hh:mm)                  | 00:06 |
| <b>Bone Marrow</b>                  |       |
| Microns per pixel ( $\mu\text{m}$ ) | 0.774 |
| Step Size (Z)( $\mu\text{m}$ )      | 4     |
| Total Z ( $\mu\text{m}$ )           | 56    |
| Scan frequency (sec)                | 20    |
| total time (hh:mm)                  | 00:40 |
| <b>Tregs vs. CTLs (tumor)</b>       |       |
| Microns per pixel ( $\mu\text{m}$ ) | 1.20  |
| Step Size (Z)( $\mu\text{m}$ )      | 5     |
| Total Z ( $\mu\text{m}$ )           | 45    |
| Scan frequency (sec)                | 15    |
| total time (hh:mm)                  | 00:08 |
| <b>CTLs in tumor regions</b>        |       |
| Microns per pixel ( $\mu\text{m}$ ) | 1.20  |
| Step Size (Z)( $\mu\text{m}$ )      | 4     |
| Total Z ( $\mu\text{m}$ )           | 52    |
| Scan frequency (sec)                | 30    |
| total time (hh:mm)                  | 00:15 |

**Supplementary Table 3. Summary of imaging acquisition and data analysis workflows**

| <b>Experiment</b> | <b>Microscopy</b>      | <b>Image analysis</b> | <b>Representation</b>           |
|-------------------|------------------------|-----------------------|---------------------------------|
| Trachea           | 2PM microscopy         | Imaris                | RStudio / tSNE                  |
| Skin-I/R          | 2PM microscopy         | Imaris                | Seurat_v4 / tSNE                |
| Skin-laser injury | 2PM microscopy         | Imaris                | Seurat_v4 / tSNE                |
| Skin-CT26 tumor   | 2PM microscopy         | Imaris                | Seurat_v4 / tSNE                |
| BM-CXCL1          | 2PM microscopy         | Imaris                | Seurat_v4 / tSNE                |
| Cremaster 4D      | Spinning-disk confocal | ACME                  | Seurat_v4 / UMAP                |
| Cremaster 2D      | Epifluorescence        | Fiji_cell tracking    | unidimensional plot<br>GraphPad |
| Cremaster 3D      | Spinning-disk confocal | Imaris                | unidimensional plot<br>GraphPad |

BM, bone marrow; I/R, ischemia-reperfusion injury

**Supplementary Table 4. General analytical workflow and modules for the imaging datasets**

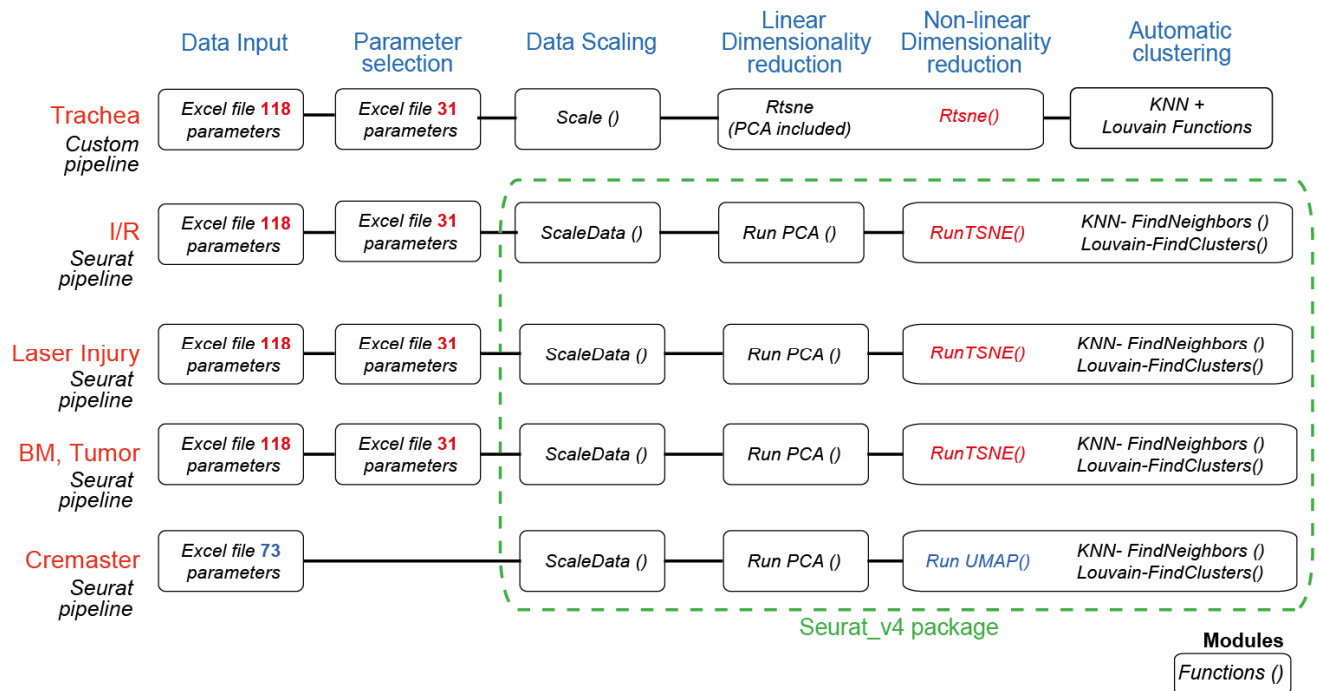

## Supplementary Table 5. List and ranking of image-extracted parameters

### Selected Variables for Imaris

| Variable # (after selection) | Parameter (Short name) | Parameter full name                        | ARI (Adjusted Rand Index) | Type (Track/Object) | Morpho/kinetic | Description                                                                                                                                                                                                   |
|------------------------------|------------------------|--------------------------------------------|---------------------------|---------------------|----------------|---------------------------------------------------------------------------------------------------------------------------------------------------------------------------------------------------------------|
| 1                            | total distance         | Total distance                             | 0.4084                    | T                   | K              | Indicates total distance travelled (i.e. the total length of displacements within the Track).                                                                                                                 |
| 2                            | max speed              | Maximum speed                              | 0.3739                    | T                   | K              |                                                                                                                                                                                                               |
| 3                            | mean speed             | Mean speed                                 | 0.3889                    | T                   | K              |                                                                                                                                                                                                               |
| 4                            | meander ratio          | Meander ratio                              | 0.3545                    | T                   | K              | Calculated as the total distance divided by the displacement length of the track. When the index is between 1 and 1.5 the track is sinuous, but if between 1.5 and 4, then meandering. Index of 1 (straight). |
| 5                            | tortuosity             | Tortuosity                                 | 0.3832                    | T                   | K              | Tortuosity is a property of a curve being tortuous. The inverse of meander ratio.                                                                                                                             |
| 6                            | angle vs stream        | Angle between the trajectory and the steam | 0.3677                    | T                   | K              | Angle between the trajectory (straight line that goes from the first position to the last position of the trajectory) and the bloodstream.                                                                    |
| 7                            | mean volume            | Mean volume                                | 0.4219                    | T                   | M              |                                                                                                                                                                                                               |
| 8                            | mean surface area      | Mean surface area                          | 0.4111                    | T                   | M              |                                                                                                                                                                                                               |
| 9                            | mean height            | Mean height respect to the wall            | 0.3930                    | T                   | M              |                                                                                                                                                                                                               |
| 10                           | mean max length        | Mean of the maximum length                 | 0.3685                    | T                   | M              |                                                                                                                                                                                                               |
| 11                           | mean H/L ratio         | Mean of the height/length ratio            | 0.4240                    | T                   | M              |                                                                                                                                                                                                               |
| 12                           | mean sphericity        | Mean sphericity                            | 0.3598                    | T                   | M              |                                                                                                                                                                                                               |
| 13                           | mean ellip prolate     | Mean ellipticity prolate                   | 0.4376                    | T                   | M              |                                                                                                                                                                                                               |
| 14                           | mean ellip oblate      | Mean ellipticity prolate                   | 0.3893                    | T                   | M              |                                                                                                                                                                                                               |
| 15                           | mean length A axis     | Mean length principal axis (A)             | 0.4401                    | T                   | M              |                                                                                                                                                                                                               |
| 16                           | mean length B axis     | Mean length second principal axis (B)      | 0.3981                    | T                   | M              |                                                                                                                                                                                                               |
| 17                           | mean length C axis     | Mean length third principal axis (C)       | 0.4260                    | T                   | M              |                                                                                                                                                                                                               |
| 18                           | mean extent            | Mean extent                                | 0.3448                    | T                   | M              |                                                                                                                                                                                                               |
| 19                           | mean solidity          | Mean solidity                              | 0.4012                    | T                   | M              |                                                                                                                                                                                                               |
| 20                           | mean equivalent diam   | Mean equivalent diameter                   | 0.4705                    | T                   | M              |                                                                                                                                                                                                               |
| 21                           | volume Std             | Standard deviation of the Volume           | 0.4151                    | T                   | M              |                                                                                                                                                                                                               |
| 22                           | surface area Std       | Standard deviation of the surface area     | 0.4788                    | T                   | M              |                                                                                                                                                                                                               |

|    |                     |                                                            |        |   |   |  |
|----|---------------------|------------------------------------------------------------|--------|---|---|--|
| 23 | max area Std        | Standard deviation of the maximum area                     | 0.3767 | T | M |  |
| 24 | max length Std      | Standard deviation of the maximum length                   | 0.4406 | T | M |  |
| 25 | H/L ratio Std       | Standard deviation of the height/length ratio              | 0.3206 | T | M |  |
| 26 | sphericity Std      | Standard deviation of sphericity                           | 0.2178 | T | M |  |
| 27 | ellip prolate Std   | Standard deviation of ellipticity prolate                  | 0.4573 | T | M |  |
| 28 | ellip oblate Std    | Standard deviation of ellipticity oblate                   | 0.4370 | T | M |  |
| 29 | length A axis Std   | Standard deviation of length principal axis (A)            | 0.5391 | T | M |  |
| 30 | length B axis Std   | Standard deviation of length principal axis (B)            | 0.5119 | T | M |  |
| 31 | length C axis Std   | Standard deviation of length principal axis (C)            | 0.4781 | T | M |  |
| 32 | extent Std          | Standard deviation of the extent                           | 0.4620 | T | M |  |
| 33 | solidity Std        | Standard deviation of the solidity                         | 0.4417 | T | M |  |
| 34 | equivalent diam Std | Standard deviation of the equivalent diameter              | 0.5305 | T | M |  |
| 35 | mean polar radius   | Mean of the polar radius                                   | 0.1925 | T | K |  |
| 36 | mean polar angle    | Mean of the polar angle                                    | 0.3787 | T | K |  |
| 37 | polar radius Std    | Standard deviation of the polar radius                     | 0.1094 | T | K |  |
| 38 | polar angle Std     | Standard deviation of the polar angle                      | 0.2835 | T | K |  |
| 39 | ori X mean          | Mean orientation respect to steam (X)                      | 0.3533 | T | K |  |
| 40 | ori Y mean          | Mean orientation respect to steam (Y)                      | 0.3886 | T | K |  |
| 41 | ori Z mean          | Mean orientation respect to steam (Z)                      | 0.3287 | T | K |  |
| 42 | ori X Std           | Standard deviation of the orientation respect to steam (X) | 0.4321 | T | K |  |
| 43 | ori Y Std           | Standard deviation of the orientation respect to steam (Y) | 0.5238 | T | K |  |



|    |                        |                                                                    |         |   |   |                                                                                                                                                                                                                                                    |
|----|------------------------|--------------------------------------------------------------------|---------|---|---|----------------------------------------------------------------------------------------------------------------------------------------------------------------------------------------------------------------------------------------------------|
| 44 | ori Z Std              | Standard deviation of the orientation respect to steam (Z)         | 0.4246  | T | K |                                                                                                                                                                                                                                                    |
| 45 | mean flattening        | Mean distance of the centre of neutrophil to the wall (flatenning) | 0.2995  | T | M |                                                                                                                                                                                                                                                    |
| 46 | mean min dist to wall  | Mean of the minimum distance to wall                               | 0.3522  | T | K | The mean of minimum distance of the neutrophil in each time step to the blood vessel surface.                                                                                                                                                      |
| 47 | track min dist to wall | Minimum distance of the trayectory to wall                         | 0.00529 | T | K | The minimum distance of a trajectory to blood vessel surface.                                                                                                                                                                                      |
| 48 | mean net score         | Mean neural network score                                          | 0.2261  | T | M |                                                                                                                                                                                                                                                    |
| 49 | max net score          | Maximum neural network score                                       | 0.2225  | T | M |                                                                                                                                                                                                                                                    |
| 50 | min net score          | Minimum neural network score                                       | 0.3640  | T | M |                                                                                                                                                                                                                                                    |
| 51 | network score range    | Neural network score range                                         | 0.3761  | T | M |                                                                                                                                                                                                                                                    |
| 52 | volume                 | Volume                                                             | 0.06198 | O | M | Number of voxels of the neutrophil.                                                                                                                                                                                                                |
| 53 | surface area           | Surface area                                                       | 0.07241 | O | M | Superficial area of the neutrophil in pixels.                                                                                                                                                                                                      |
| 54 | height                 | Height respect to the wall                                         | 0.00595 | O | M | Height of the neutrophil respect to the vessel wall.                                                                                                                                                                                               |
| 55 | max length             | Maximum length                                                     | 0.02487 | O | M | Maximum width of an object                                                                                                                                                                                                                         |
| 56 | H/L ratio              | height/length ratio                                                | 0.03479 | O | M | height/length ratio of a neutrophil (object)                                                                                                                                                                                                       |
| 57 | sphericity             | Sphericity                                                         | 0.01640 | O | M | Sphericity measures how closely the shape of an object resembles that of a perfect sphere. Any particle that is not a sphere will have sphericity less than 1.                                                                                     |
| 58 | ellipticity prolate    | Ellipticity prolate                                                | 0.01645 | O | M | An oblate spheroid is the shape of the Earth and some other planets. It is like a sphere squashed from the top so the circumference around the poles is less than the circumference around the equator. Shapes of this type are called ellipsoids. |
| 59 | ellipticity oblate     | Ellipticity oblate                                                 | 0.01220 | O | M | Prolate spheroids — A <i>spheroid</i> has circular symmetry. If the ellipse is rotated about its major axis, the result is a <i>prolate</i> (elongated) <i>spheroid</i> , shaped like an American football or rugby ball.                          |
| 60 | length A axis          | Length principal axis (A)                                          | 0.01676 | O | M | Length of the longest principal axis of the best-fitted ellipsoid into the segmented object (neutrophil)                                                                                                                                           |
| 61 | length B axis          | Length second principal axis (B)                                   | 0.04391 | O | M | Length of the second principal axis of the best-fitted ellipsoid into the segmented object (neutrophil). B is perpendicular to A and C.                                                                                                            |
| 62 | length C axis          | Length third principal axis (C)                                    | 0.05992 | O | M | Length of the third principal axis of the best-fitted ellipsoid into the segmented object (neutrophil). C is perpendicular to A and B.                                                                                                             |
| 63 | extent                 | Extent                                                             | 0.01455 | O | M | Pixel ratio between the neutrophil and the bounding box that contains it (it can be an indicator of the quality of the                                                                                                                             |

|    |                      |                                                        |         |   |   |                                                                                                                                                                                                                                                                                                                                                     |
|----|----------------------|--------------------------------------------------------|---------|---|---|-----------------------------------------------------------------------------------------------------------------------------------------------------------------------------------------------------------------------------------------------------------------------------------------------------------------------------------------------------|
|    |                      |                                                        |         |   |   | segmentation, since a good segmentation must be compact).                                                                                                                                                                                                                                                                                           |
| 64 | solidity             | Solidity                                               | 0.01917 | O | M | Pixel ratio between the region and the smallest convex polygon that encompasses the region (as above, it can be an indicator of the compactness of the segmentation).                                                                                                                                                                               |
| 65 | equivalent diam      | Equivalent diameter                                    | 0.06950 | O | M | The equivalent diameter is defined as the diameter of a circle with an equal aggregate sectional area, which is calculated by $d = 2 \text{ Area} / \pi$ .                                                                                                                                                                                          |
| 66 | ori X stream         | Orientation respect to steam (X)                       | 0.01707 | O | K | 3D orientation of the neutrophil with respect to the direction of the bloodstream along the trajectory (X axis).                                                                                                                                                                                                                                    |
| 67 | ori Y stream         | Orientation respect to steam (Y)                       | 0.02472 | O | K | 3D orientation of the neutrophil with respect to the direction of the bloodstream along the trajectory (Y axis).                                                                                                                                                                                                                                    |
| 68 | ori Z stream         | Orientation respect to steam (Z)                       | 0.01141 | O | K | 3D orientation of the neutrophil with respect to the direction of the bloodstream along the trajectory (Z axis).                                                                                                                                                                                                                                    |
| 69 | polar radius         | Polar radius                                           | 0.03839 | O | K | 3D position of the neutrophil with respect to the cross section of the vessel in polar coordinates: distance from the center (between 0 and 1).                                                                                                                                                                                                     |
| 70 | polar angle          | Polar angle                                            | 0.02997 | O | K | 3D position of the neutrophil with respect to the cross section of the vessel in polar coordinates: angle (between 0 and $2\pi$ ).                                                                                                                                                                                                                  |
| 71 | flattening           | Distance centre of neutrophil to the wall (flattening) | 0.00482 | O | M | Distance between the center of the neutrophil (object) and the vessel wall.                                                                                                                                                                                                                                                                         |
| 72 | min distance to wall | Minimum distance to wall                               | 0.00157 | O | K | Minimum distance between the neutrophil (object) and the vessel surface (that of the voxel closest to the vessel).                                                                                                                                                                                                                                  |
| 73 | network score        | Neural network score                                   | 0.01591 | O | M | The neural network includes a module that provides a probability value between 0 and 1 for each of the 3D regions resulting from the segmentation. This value indicates the reliability of each region based on its size and shape (for example, compact regions with a size similar to that of the neutrophils of interest will be more reliable). |

### Ranking (LRI/ARI) of the Selected Variables for Imaris

| Variable # (after selection) | Parameter (full name) | Trachea LRI | Laser injury LRI | Ischemia reperfusion ARI | Geometric mean | Morpho/kintic | Description                                                                                                          |
|------------------------------|-----------------------|-------------|------------------|--------------------------|----------------|---------------|----------------------------------------------------------------------------------------------------------------------|
| 97                           | Track Speed Variation | 0.9139      | 0.00326          | 0.08261                  | 0.06267        | K             | Ratio of the Track Standard Deviation to the Track Speed Mean value; i.e. variability 'normalized' to its own speed. |
| 64                           | Track Area Mean       | 0.7569      | 0.1047           | 0.2427                   | 0.2679         | M             | Mean of surface area of the object along the track.                                                                  |

|     |                                    |        |         |         |         |   |                                                                                                                                                                                                      |
|-----|------------------------------------|--------|---------|---------|---------|---|------------------------------------------------------------------------------------------------------------------------------------------------------------------------------------------------------|
| 100 | Track Volume Mean                  | 0.7237 | 0.2745  | 0.3797  | 0.4225  | M | The mean volume of all Surfaces along the tracks.                                                                                                                                                    |
| 83  | Track Ellipsoid Axis Length B Mean | 0.6445 | 0.2048  | 0.1039  | 0.2394  | M | Mean of the length of the second longest principal axis of the best-fitted ellipsoid into the objects that forms the track.                                                                          |
| 82  | Track Ellipsoid Axis Length A Mean | 0.6358 | 0.2527  | 0.1553  | 0.2922  | M | Mean of the length of the shortest principal axis of the best-fitted ellipsoid into the objects that forms the track.                                                                                |
| 8   | Area                               | 0.6309 | 0.05402 | 0.1176  | 0.1588  | M | Surface area of the object.                                                                                                                                                                          |
| 56  | Volume                             | 0.6029 | 0.1663  | 0.2478  | 0.2918  | M | Quantification of how much space an object occupies.                                                                                                                                                 |
| 84  | Track Ellipsoid Axis Length C Mean | 0.5808 | 0.1664  | 0.2965  | 0.3060  | M | Mean of the length of the longest principal axis of the best-fitted ellipsoid into the objects that forms the track.                                                                                 |
| 40  | Ellipsoid Axis Length B            | 0.4981 | 0.09786 | 0.02034 | 0.0997  | M | Length of the second longest principal axes of the best-fitted ellipsoid into the surface.                                                                                                           |
| 39  | Ellipsoid Axis Length A            | 0.4848 | 0.1207  | 0.05635 | 0.1490  | M | Length of the shortest principal axes of the best-fitted ellipsoid into the surface.                                                                                                                 |
| 95  | Track Speed Mean                   | 0.4546 | 0.5140  | 0.2759  | 0.4010  | K | Mean of the value of the object's speed on the track.                                                                                                                                                |
| 41  | Ellipsoid Axis Length C            | 0.4405 | 0.08559 | 0.1316  | 0.1706  | M | Length of the longest principal axes of the best-fitted ellipsoid into the surface.                                                                                                                  |
| 71  | Track Displacement Length          | 0.4323 | 0.00042 | 0.1040  | 0.02663 | K | The object's Track Displacement is the distance between the first and last object's position.                                                                                                        |
| 46  | Speed                              | 0.3443 | 0.1131  | 0.05282 | 0.1272  | K | instantaneous speed of the object ( $\mu\text{m/s}$ )                                                                                                                                                |
| 99  | Track Straightness                 | 0.3319 | 0.1581  | 0.03790 | 0.1258  | K | Equals Track Displacement/ Track Length                                                                                                                                                              |
| 21  | Displacement 2                     | 0.2841 | 0.00221 | 0.06798 | 0.03495 | K | The square of the distance of the object from the starting point of the track (also known as mean square displacement: MSD) when plotted against the relative time since the beginning of the track. |
| 72  | Track Duration                     | 0.2299 | 0.02112 | 0.1106  | 0.08128 | K | The Track Duration is the duration between the first and last time point within the track.                                                                                                           |
| 25  | Displacement Delta Length          | 0.2130 | 0.1763  | 0.08985 | 0.1500  | K | The length of the position difference of the current object and the previous object of the same track.                                                                                               |
| 117 | TrackX Sphericity Std              | 0.1830 | 0.2667  | 0.06521 | 0.1471  | M | Describes the SD of Surfaces Sphericity along the tracks.                                                                                                                                            |
| 98  | Track Sphericity Mean              | 0.1516 | 0.2102  | 0.3604  | 0.2256  | M | Describes the mean Surfaces Sphericity along the tracks.                                                                                                                                             |
| 115 | TrackX Ellipticity(prolate) Std    | 0.1467 | 0.09620 | 0.09357 | 0.1097  | M | This parameter defines the SD of the Ellipsoid                                                                                                                                                       |

|     |                                 |         |         |         |         |   |                                                                                                                                                                                                                                                                                                                                       |
|-----|---------------------------------|---------|---------|---------|---------|---|---------------------------------------------------------------------------------------------------------------------------------------------------------------------------------------------------------------------------------------------------------------------------------------------------------------------------------------|
|     |                                 |         |         |         |         |   | Prolate for the track (see below for the detailed prolate definition).                                                                                                                                                                                                                                                                |
| 113 | TrackX Ellipticity(oblate) Std  | 0.1266  | 0.1218  | 0.04042 | 0.08542 | M | This parameter defines the SD of the Ellipsoid Oblate for the track (see below for the detailed oblate definition)                                                                                                                                                                                                                    |
| 47  | Sphericity                      | 0.1054  | 0.1060  | 0.2082  | 0.1325  | M | Sphericity is a measure of how spherical an object is. When the value = 1, the volume is a sphere.                                                                                                                                                                                                                                    |
| 4   | Acceleration                    | 0.05262 | 0.1197  | 0.1047  | 0.0870  | K | Acceleration is the change in the Surface velocity over time. The acceleration at the first and last time-point is 0.                                                                                                                                                                                                                 |
| 103 | TrackX BoundingBoxOOLengthB Std | 0.02733 | 0.01059 | 0.06822 | 0.02702 | M | BoundingBoxOO (object oriented) identifies an object by considering the minimal rectangular box, which fully encloses the object. The box dimensions are calculated with no constraints to the orientation. SD of the length of the second longest principal axis of the best-fitted ellipsoid into the objects that forms the track. |
| 101 | TrackX BoundingBoxOOLengthA Std | 0.01131 | 0.00088 | 0.06758 | 0.00876 | M | BoundingBoxOO (object oriented) identifies an object by considering the minimal rectangular box, which fully encloses the object. The box dimensions are calculated with no constraints to the orientation. SD of the length of the shortest principal axis of the best-fitted ellipsoid into the objects that forms the track.       |
| 105 | TrackX BoundingBoxOOLengthC Std | 0.00863 | 0.00496 | 0.1145  | 0.01699 | M | BoundingBoxOO (object oriented) identifies an object by considering the minimal rectangular box, which fully encloses the object. The box dimensions are calculated with no constraints to the orientation. Mean of the length of the longest principal axis of the best-fitted ellipsoid into the objects that forms the track.      |
| 86  | Track Ellipticity Prolate Mean  | 0.00142 | 0.01135 | 0.08283 | 0.01101 | M | This parameter defines the mean Ellipsoid Prolate for the track (see below for the detailed prolate definition).                                                                                                                                                                                                                      |
| 43  | Ellipticity (prolate)           | 0.00069 | 0.00163 | 0.01615 | 0.00263 | M | A prolate spheroid is a sphere (or ellipsoid) squashed from the equator so that ellipses around the poles are longer than the                                                                                                                                                                                                         |

|    |                               |         |         |         |         |   |                                                                                                                                                              |
|----|-------------------------------|---------|---------|---------|---------|---|--------------------------------------------------------------------------------------------------------------------------------------------------------------|
|    |                               |         |         |         |         |   | circumference around the equator.                                                                                                                            |
| 85 | Track Ellipticity Oblate Mean | 0.00027 | 0.02884 | 0.1305  | 0.01005 | M | This parameter defines the mean Ellipsoid Oblate for the track (see below for the detailed oblate definition)                                                |
| 42 | Ellipticity (oblate)          | 0.00014 | 0.00481 | 0.03579 | 0.00288 | M | An oblate spheroid is a sphere (or ellipsoid) squashed from the top so that ellipses around the poles are shorter than the circumference around the equator. |

### Full List of the Imaris-extracted parameters (Trachea experiment)

| Variable # | Parameter (full name)              | LRI (Likelihood Ratio Index) | Morpho/kinetic |
|------------|------------------------------------|------------------------------|----------------|
| 1          | PosX                               | 0.02821                      | -              |
| 2          | PosY                               | 0.00291                      | -              |
| 3          | PosZ                               | 0.3517                       | -              |
| 4          | Acceleration                       | 0.05262                      | K              |
| 5          | Acceleration_VectorX               | 7.58316*10 <sup>-6</sup>     | K              |
| 6          | Acceleration_VectorY               | 9.43658*10 <sup>-8</sup>     | K              |
| 7          | Acceleration_VectorZ               | 0.00026954                   | K              |
| 8          | Area                               | 0.6309                       | M              |
| 9          | BoundingBoxAA_LengthX              | 0.4927                       | M              |
| 10         | BoundingBoxAA_LengthY              | 0.3789                       | M              |
| 11         | BoundingBoxAA_LengthZ              | 0.3112                       | M              |
| 12         | BoundingBoxOO_LengthX              | 0.5675                       | M              |
| 13         | BoundingBoxOO_LengthY              | 0.5660                       | M              |
| 14         | BoundingBoxOO_LengthZ              | 0.5449                       | M              |
| 15         | Center_of_Homogeneous_MassX        | 0.02821                      | -              |
| 16         | Center_of_Homogeneous_MassY        | 0.00291                      | -              |
| 17         | Center_of_Homogeneous_MassZ        | 0.3517                       | -              |
| 18         | DisplacementX                      | 0.00868                      | K              |
| 19         | DisplacementY                      | 0.00032552                   | K              |
| 20         | DisplacementZ                      | 0.05285                      | K              |
| 21         | Displacement_2                     | 0.2841                       | K              |
| 22         | Displacement_DeltaX                | 0.00503                      | K              |
| 23         | Displacement_DeltaY                | 0.000512577                  | K              |
| 24         | Displacement_DeltaZ                | 0.00256                      | K              |
| 25         | Displacement_Delta_Length          | 0.2130                       | K              |
| 26         | Displacement_Length                | 0.3133                       | K              |
| 27         | Distance_from_Origin               | 0.03962                      | K              |
| 28         | Distance_to_Image_Border_XYZ_Img_1 | 0.05569                      | K              |
| 29         | Distance_to_Image_Border_XY_Img_1  | 0.08841                      | K              |
| 30         | Ellipsoid_Axis_AX                  | 0.01498                      | M              |
| 31         | Ellipsoid_Axis_AY                  | 0.000109567                  | M              |

|    |                                        |              |   |
|----|----------------------------------------|--------------|---|
| 32 | Ellipsoid_Axis_AZ                      | 0.00064845   | M |
| 33 | Ellipsoid_Axis_BX                      | 0.00574      | M |
| 34 | Ellipsoid_Axis_BY                      | 0.000484091  | M |
| 35 | Ellipsoid_Axis_BZ                      | 0.00114      | M |
| 36 | Ellipsoid_Axis_CX                      | 0.0000146000 | M |
| 37 | Ellipsoid_Axis_CY                      | 0.0000121000 | M |
| 38 | Ellipsoid_Axis_CZ                      | 0.00661      | M |
| 39 | Ellipsoid_Axis_Length_A                | 0.4848       | M |
| 40 | Ellipsoid_Axis_Length_B                | 0.4981       | M |
| 41 | Ellipsoid_Axis_Length_C                | 0.4405       | M |
| 42 | Ellipticity_(oblate)                   | 0.0001350000 | M |
| 43 | Ellipticity_(prolate)                  | 0.0006930000 | M |
| 44 | Number_of_Triangles                    | 0.6031       | M |
| 45 | Number_of_Voxels_Img_1                 | 0.5757       | M |
| 46 | Speed                                  | 0.3443       | K |
| 47 | Sphericity                             | 0.1054       | M |
| 48 | Time                                   | 0.0003900000 | - |
| 49 | Time_Since_Track_Start                 | 0.08998      | - |
| 50 | VelocityX                              | 0.00767      | K |
| 51 | VelocityY                              | 0.0008400000 | K |
| 52 | VelocityZ                              | 0.00483      | K |
| 53 | Velocity_AngleX                        | 0.00191      | K |
| 54 | Velocity_AngleY                        | 0.0002500000 | K |
| 55 | Velocity_AngleZ                        | 0.0003640000 | K |
| 56 | Volume                                 | 0.6029       | M |
| 57 | TrPosMeanX                             | 0.02831      | - |
| 58 | TrPosMeanY                             | 0.00292      | - |
| 59 | TrPosMeanZ                             | 0.3601       | - |
| 60 | Track_Ar1X                             | 0.01449      | K |
| 61 | Track_Ar1Y                             | 0.01898      | K |
| 62 | Track_Ar1Z                             | 0.02467      | K |
| 63 | Track_Ar1_Mean                         | 0.01920      | K |
| 64 | Track_Area_Mean                        | 0.7569       | M |
| 65 | Track_Center_of_Homogeneous_Mass_MeanX | 0.02768      | - |
| 66 | Track_Center_of_Homogeneous_Mass_MeanY | 0.00304      | - |
| 67 | Track_Center_of_Homogeneous_Mass_MeanZ | 0.3723       | - |
| 68 | Track_DisplacementX                    | 0.03247      | K |
| 69 | Track_DisplacementY                    | 0.00483      | K |
| 70 | Track_DisplacementZ                    | 0.05722      | K |
| 71 | Track_Displacement_Length              | 0.4323       | K |
| 72 | Track_Duration                         | 0.2299       | K |
| 73 | Track_Ellipsoid_Axis_A_MeanX           | 0.06204      | M |
| 74 | Track_Ellipsoid_Axis_A_MeanY           | 0.0004600000 | M |
| 75 | Track_Ellipsoid_Axis_A_MeanZ           | 0.00224      | M |

|     |                                    |              |   |
|-----|------------------------------------|--------------|---|
| 76  | Track_Ellipsoid_Axis_B_MeanX       | 0.02249      | M |
| 77  | Track_Ellipsoid_Axis_B_MeanY       | 0.00136      | M |
| 78  | Track_Ellipsoid_Axis_B_MeanZ       | 0.00584      | M |
| 79  | Track_Ellipsoid_Axis_C_MeanX       | 0.0000488000 | M |
| 80  | Track_Ellipsoid_Axis_C_MeanY       | 0.0000557000 | M |
| 81  | Track_Ellipsoid_Axis_C_MeanZ       | 0.01544      | M |
| 82  | Track_Ellipsoid_Axis_Length_A_Mean | 0.6358       | M |
| 83  | Track_Ellipsoid_Axis_Length_B_Mean | 0.6445       | M |
| 84  | Track_Ellipsoid_Axis_Length_C_Mean | 0.5808       | M |
| 85  | Track_Ellipticity_Oblate_Mean      | 0.0002730000 | M |
| 86  | Track_Ellipticity_Prolate_Mean     | 0.00142      | M |
| 87  | Track_Length                       | 0.07954      | K |
| 88  | Track_Number_of_Surfaces           | 0.2346       | - |
| 89  | Track_Number_of_Triangles          | 0.5072       | M |
| 90  | Track_Number_of_Voxels_Img_1       | 0.5342       | M |
| 91  | Track_Position_StartX              | 0.02457      | - |
| 92  | Track_Position_StartY              | 0.00319      | - |
| 93  | Track_Position_StartZ              | 0.2734       | - |
| 94  | Track_Speed_Max                    | 0.2260       | K |
| 95  | Track_Speed_Mean                   | 0.4546       | K |
| 96  | Track_Speed_StdDev                 | 0.1878       | K |
| 97  | Track_Speed_Variation              | 0.9139       | K |
| 98  | Track_Sphericity_Mean              | 0.1516       | M |
| 99  | Track_Straightness                 | 0.3319       | K |
| 100 | Track_Volume_Mean                  | 0.7237       | M |
| 101 | TrackX_BoundingBoxOO_LengthX_Std   | 0.01131      | M |
| 102 | TrackX_BoundingBoxOO_LengthX_Vrn   | 0.2979       | M |
| 103 | TrackX_BoundingBoxOO_LengthY_Std   | 0.02733      | M |
| 104 | TrackX_BoundingBoxOO_LengthY_Vrn   | 0.2112       | M |
| 105 | TrackX_BoundingBoxOO_LengthZ_Std   | 0.00863      | M |
| 106 | TrackX_BoundingBoxOO_LengthZ_Vrn   | 0.2423       | M |
| 107 | TrackX_Ellipsoid_Axis_Length_A_Std | 0.0000800000 | M |
| 108 | TrackX_Ellipsoid_Axis_Length_A_Vrn | 0.2630       | M |
| 109 | TrackX_Ellipsoid_Axis_Length_B_Std | 0.00656      | M |
| 110 | TrackX_Ellipsoid_Axis_Length_B_Vrn | 0.1742       | M |
| 111 | TrackX_Ellipsoid_Axis_Length_C_Std | 0.00534      | M |
| 112 | TrackX_Ellipsoid_Axis_Length_C_Vrn | 0.1830       | M |
| 113 | TrackX_Ellipticity_(oblate)_Std    | 0.1266       | M |
| 114 | TrackX_Ellipticity_(oblate)_Vrn    | 0.1009       | M |
| 115 | TrackX_Ellipticity_(prolate)_Std   | 0.1467       | M |
| 116 | TrackX_Ellipticity_(prolate)_Vrn   | 0.09417      | M |
| 117 | TrackX_Sphericity_Std              | 0.1830       | M |
| 118 | TrackX_Sphericity_Vrn              | 0.08196      | M |

## Full List of the Imaris-extracted parameters (I/R model)

| Variable # | Parameter (full name)              | ARI (Adjusted Rand Index) | Morpho/kinetic |
|------------|------------------------------------|---------------------------|----------------|
| 1          | PosX                               | 0.199812                  | -              |
| 2          | PosY                               | 0.0134792                 | -              |
| 3          | PosZ                               | 0.0959785                 | -              |
| 4          | Acceleration                       | 0.104706                  | K              |
| 5          | Acceleration_VectorX               | -0.0011867                | K              |
| 6          | Acceleration_VectorY               | 0.00383366                | K              |
| 7          | Acceleration_VectorZ               | 0.0030997                 | K              |
| 8          | Area                               | 0.117614                  | M              |
| 9          | BoundingBoxAA_LengthX              | 0.0227233                 | M              |
| 10         | BoundingBoxAA_LengthY              | 0.0376718                 | M              |
| 11         | BoundingBoxAA_LengthZ              | 0.191715                  | M              |
| 12         | BoundingBoxOO_LengthX              | 0.0561999                 | M              |
| 13         | BoundingBoxOO_LengthY              | 0.0161615                 | M              |
| 14         | BoundingBoxOO_LengthZ              | 0.16488                   | M              |
| 15         | Center_of_Homogeneous_MassX        | 0.199812                  | -              |
| 16         | Center_of_Homogeneous_MassY        | 0.0134792                 | -              |
| 17         | Center_of_Homogeneous_MassZ        | 0.0959785                 | -              |
| 18         | DisplacementX                      | 0.0400756                 | K              |
| 19         | DisplacementY                      | 0.0400721                 | K              |
| 20         | DisplacementZ                      | 0.0209411                 | K              |
| 21         | Displacement_2                     | 0.067975                  | K              |
| 22         | Displacement_DeltaX                | 0.0526806                 | K              |
| 23         | Displacement_DeltaY                | 0.0436453                 | K              |
| 24         | Displacement_DeltaZ                | 0.045846                  | K              |
| 25         | Displacement_Delta_Length          | 0.089845                  | K              |
| 26         | Displacement_Length                | 0.0684016                 | K              |
| 27         | Distance_from-Origin               | 0.191899                  | K              |
| 28         | Distance_to_Image_Border_XYZ_Img_1 | 0.053547                  | K              |
| 29         | Distance_to_Image_Border_XY_Img_1  | 0.0010355                 | K              |
| 30         | Ellipsoid_Axis_AX                  | 0.00390094                | M              |
| 31         | Ellipsoid_Axis_AY                  | 0.00265001                | M              |
| 32         | Ellipsoid_Axis_AZ                  | 0.0197113                 | M              |
| 33         | Ellipsoid_Axis_BX                  | 0.00596838                | M              |
| 34         | Ellipsoid_Axis_BY                  | 0.0215016                 | M              |
| 35         | Ellipsoid_Axis_BZ                  | 0.0587948                 | M              |
| 36         | Ellipsoid_Axis_CX                  | 0.0364135                 | M              |
| 37         | Ellipsoid_Axis_CY                  | 0.0511461                 | M              |
| 38         | Ellipsoid_Axis_CZ                  | 0.0695831                 | M              |
| 39         | Ellipsoid_Axis_Length_A            | 0.0563467                 | M              |
| 40         | Ellipsoid_Axis_Length_B            | 0.0203416                 | M              |
| 41         | Ellipsoid_Axis_Length_C            | 0.131645                  | M              |
| 42         | Ellipticity_(oblate)               | 0.0357881                 | M              |



|    |                                        |            |   |
|----|----------------------------------------|------------|---|
| 43 | Ellipticity_(prolate)                  | 0.0161523  | M |
| 44 | Number_of_Triangles                    | 0.12309    | M |
| 45 | Number_of_Voxels_Img_1                 | 0.227189   | M |
| 46 | Speed                                  | 0.0528194  | K |
| 47 | Sphericity                             | 0.208156   | M |
| 48 | Time                                   | 0.00847723 | - |
| 49 | Time_Since_Track_Start                 | 0.0274705  | - |
| 50 | VelocityX                              | 0.0318647  | K |
| 51 | VelocityY                              | 0.0267809  | K |
| 52 | VelocityZ                              | 0.0164558  | K |
| 53 | Velocity_AngleX                        | 0.00461156 | K |
| 54 | Velocity_AngleY                        | 0.00834365 | K |
| 55 | Velocity_AngleZ                        | 0.00674175 | K |
| 56 | Volume                                 | 0.247763   | M |
| 57 | TrPosMeanX                             | 0.201936   | - |
| 58 | TrPosMeanY                             | 0.0293915  | - |
| 59 | TrPosMeanZ                             | 0.1278     | - |
| 60 | Track_Ar1X                             | 0.0195397  | K |
| 61 | Track_Ar1Y                             | 0.0273641  | K |
| 62 | Track_Ar1Z                             | 0.00942567 | K |
| 63 | Track_Ar1_Mean                         | 0.0280121  | K |
| 64 | Track_Area_Mean                        | 0.242658   | M |
| 65 | Track_Center_of_Homogeneous_Mass_MeanX | 0.194032   | - |
| 66 | Track_Center_of_Homogeneous_Mass_MeanY | 0.037175   | - |
| 67 | Track_Center_of_Homogeneous_Mass_MeanZ | 0.130334   | - |
| 68 | Track_DisplacementX                    | 0.0872252  | K |
| 69 | Track_DisplacementY                    | 0.092103   | K |
| 70 | Track_DisplacementZ                    | 0.0549932  | K |
| 71 | Track_Displacement_Length              | 0.104001   | K |
| 72 | Track_Duration                         | 0.110579   | K |
| 73 | Track_Ellipsoid_Axis_A_MeanX           | 0.0509026  | M |
| 74 | Track_Ellipsoid_Axis_A_MeanY           | 0.0689269  | M |
| 75 | Track_Ellipsoid_Axis_A_MeanZ           | 0.0486089  | M |
| 76 | Track_Ellipsoid_Axis_B_MeanX           | 0.0421736  | M |
| 77 | Track_Ellipsoid_Axis_B_MeanY           | 0.0522001  | M |
| 78 | Track_Ellipsoid_Axis_B_MeanZ           | 0.0917855  | M |
| 79 | Track_Ellipsoid_Axis_C_MeanX           | 0.0596638  | M |
| 80 | Track_Ellipsoid_Axis_C_MeanY           | 0.104145   | M |
| 81 | Track_Ellipsoid_Axis_C_MeanZ           | 0.153649   | M |
| 82 | Track_Ellipsoid_Axis_Length_A_Mean     | 0.155325   | M |
| 83 | Track_Ellipsoid_Axis_Length_B_Mean     | 0.103889   | M |
| 84 | Track_Ellipsoid_Axis_Length_C_Mean     | 0.296532   | M |
| 85 | Track_Ellipticity_Oblate_Mean          | 0.130508   | M |
| 86 | Track_Ellipticity_Prolate_Mean         | 0.0828341  | M |

|     |                                    |           |   |
|-----|------------------------------------|-----------|---|
| 87  | Track_Length                       | 0.25157   | K |
| 88  | Track_Number_of_Surfaces           | 0.104596  | - |
| 89  | Track_Number_of_Triangles          | 0.153894  | M |
| 90  | Track_Number_of_Voxels_Img_1       | 0.248616  | M |
| 91  | Track_Position_StartX              | 0.194621  | - |
| 92  | Track_Position_StartY              | 0.0312247 | - |
| 93  | Track_Position_StartZ              | 0.093343  | - |
| 94  | Track_Speed_Max                    | 0.269933  | K |
| 95  | Track_Speed_Mean                   | 0.275931  | K |
| 96  | Track_Speed_StdDev                 | 0.195366  | K |
| 97  | Track_Speed_Variation              | 0.082606  | K |
| 98  | Track_Sphericity_Mean              | 0.360418  | M |
| 99  | Track_Straightness                 | 0.0378991 | K |
| 100 | Track_Volume_Mean                  | 0.379741  | M |
| 101 | TrackX_BoundingBoxOO_LengthX_Std   | 0.0675782 | M |
| 102 | TrackX_BoundingBoxOO_LengthX_Vrn   | 0.0547006 | M |
| 103 | TrackX_BoundingBoxOO_LengthY_Std   | 0.0682231 | M |
| 104 | TrackX_BoundingBoxOO_LengthY_Vrn   | 0.0734061 | M |
| 105 | TrackX_BoundingBoxOO_LengthZ_Std   | 0.114533  | M |
| 106 | TrackX_BoundingBoxOO_LengthZ_Vrn   | 0.0528588 | M |
| 107 | TrackX_Ellipsoid_Axis_Length_A_Std | 0.0605932 | M |
| 108 | TrackX_Ellipsoid_Axis_Length_A_Vrn | 0.0521802 | M |
| 109 | TrackX_Ellipsoid_Axis_Length_B_Std | 0.110174  | M |
| 110 | TrackX_Ellipsoid_Axis_Length_B_Vrn | 0.0918706 | M |
| 111 | TrackX_Ellipsoid_Axis_Length_C_Std | 0.0879851 | M |
| 112 | TrackX_Ellipsoid_Axis_Length_C_Vrn | 0.0528872 | M |
| 113 | TrackX_Ellipticity_(oblate)_Std    | 0.0404199 | M |
| 114 | TrackX_Ellipticity_(oblate)_Vrn    | 0.131004  | M |
| 115 | TrackX_Ellipticity_(prolate)_Std   | 0.0935684 | M |
| 116 | TrackX_Ellipticity_(prolate)_Vrn   | 0.0393121 | M |
| 117 | TrackX_Sphericity_Std              | 0.0652086 | M |
| 118 | TrackX_Sphericity_Vrn              | 0.0968026 | M |

### Full List of the Imaris-extracted parameters (Laser injury model)

| Variable # | Parameter (full name) | LRI (Likelihood Ratio Index) | Morpho/kinetic |
|------------|-----------------------|------------------------------|----------------|
| 1          | PosX                  | 0.0168261                    | -              |
| 2          | PosY                  | 0.0392471                    | -              |
| 3          | PosZ                  | 0.0138623                    | -              |
| 4          | Acceleration          | 0.119743                     | K              |
| 5          | Acceleration_VectorX  | 9.26003*10 <sup>-10</sup>    | K              |
| 6          | Acceleration_VectorY  | 1.55634*10 <sup>-7</sup>     | K              |
| 7          | Acceleration_VectorZ  | 0.0000282144                 | K              |

|    |                                    |               |   |
|----|------------------------------------|---------------|---|
| 8  | Area                               | 0.05402       | M |
| 9  | BoundingBoxAA_LengthX              | 0.215489      | M |
| 10 | BoundingBoxAA_LengthY              | 0.208612      | M |
| 11 | BoundingBoxAA_LengthZ              | 0.00346372    | M |
| 12 | BoundingBoxOO_LengthX              | 0.12183       | M |
| 13 | BoundingBoxOO_LengthY              | 0.11817       | M |
| 14 | BoundingBoxOO_LengthZ              | 0.0656389     | M |
| 15 | Center_of_Homogeneous_MassX        | 0.0168261     | - |
| 16 | Center_of_Homogeneous_MassY        | 0.0392471     | - |
| 17 | Center_of_Homogeneous_MassZ        | 0.0138623     | - |
| 18 | DisplacementX                      | 0.000276114   | K |
| 19 | DisplacementY                      | 0.000866898   | K |
| 20 | DisplacementZ                      | 0.00315104    | K |
| 21 | Displacement_2                     | 0.00221264    | K |
| 22 | Displacement_DeltaX                | 3.13805*10^-6 | K |
| 23 | Displacement_DeltaY                | 0.000203754   | K |
| 24 | Displacement_DeltaZ                | 0.0000149753  | K |
| 25 | Displacement_Delta_Length          | 0.176337      | K |
| 26 | Displacement_Length                | 0.00305491    | K |
| 27 | Distance_from_Origin               | 0.0273929     | K |
| 28 | Distance_to_Image_Border_XYZ_Img_1 | 0.0174722     | K |
| 29 | Distance_to_Image_Border_XY_Img_1  | 0.212328      | K |
| 30 | Ellipsoid_Axis_AX                  | 0.000705328   | M |
| 31 | Ellipsoid_Axis_AY                  | 0.000503991   | M |
| 32 | Ellipsoid_Axis_AZ                  | 0.00081884    | M |
| 33 | Ellipsoid_Axis_BX                  | 0.000711085   | M |
| 34 | Ellipsoid_Axis_BY                  | 0.0086879     | M |
| 35 | Ellipsoid_Axis_BZ                  | 0.00313848    | M |
| 36 | Ellipsoid_Axis_CX                  | 0.00147093    | M |
| 37 | Ellipsoid_Axis_CY                  | 0.0148913     | M |
| 38 | Ellipsoid_Axis_CZ                  | 0.113218      | M |
| 39 | Ellipsoid_Axis_Length_A            | 0.120737      | M |
| 40 | Ellipsoid_Axis_Length_B            | 0.0978613     | M |
| 41 | Ellipsoid_Axis_Length_C            | 0.0855932     | M |
| 42 | Ellipticity_(oblate)               | 0.00480699    | M |
| 43 | Ellipticity_(prolate)              | 0.00163375    | M |
| 44 | Number_of_Triangles                | 0.0970691     | M |
| 45 | Number_of_Voxels_Img_1             | 0.140969      | M |
| 46 | Speed                              | 0.113132      | K |
| 47 | Sphericity                         | 0.106042      | M |
| 48 | Time                               | 0.00457403    | - |
| 49 | Time_Since_Track_Start             | 0.0144588     | - |
| 50 | VelocityX                          | 2.31073*10^-6 | K |
| 51 | VelocityY                          | 0.000439806   | K |

|    |                                        |               |   |
|----|----------------------------------------|---------------|---|
| 52 | VelocityZ                              | 4.40869*10^-7 | K |
| 53 | Velocity_AngleX                        | 0.0000672533  | K |
| 54 | Velocity_AngleY                        | 0.00042618    | K |
| 55 | Velocity_AngleZ                        | 0.0000981268  | K |
| 56 | Volume                                 | 0.166302      | M |
| 57 | TrPosMeanX                             | 0.0175163     | - |
| 58 | TrPosMeanY                             | 0.0408592     | - |
| 59 | TrPosMeanZ                             | 0.0200071     | - |
| 60 | Track_Ar1X                             | 1.42425*10^-6 | K |
| 61 | Track_Ar1Y                             | 1.04298*10^-8 | K |
| 62 | Track_Ar1Z                             | 6.51116*10^-6 | K |
| 63 | Track_Ar1_Mean                         | 1.46908*10^-6 | K |
| 64 | Track_Area_Mean                        | 0.104663      | M |
| 65 | Track_Center_of_Homogeneous_Mass_MeanX | 0.0173689     | - |
| 66 | Track_Center_of_Homogeneous_Mass_MeanY | 0.0416838     | - |
| 67 | Track_Center_of_Homogeneous_Mass_MeanZ | 0.023701      | - |
| 68 | Track_DisplacementX                    | 0.0000219335  | K |
| 69 | Track_DisplacementY                    | 0.00159672    | K |
| 70 | Track_DisplacementZ                    | 0.00326279    | K |
| 71 | Track_Displacement_Length              | 0.000417457   | K |
| 72 | Track_Duration                         | 0.0211158     | K |
| 73 | Track_Ellipsoid_Axis_A_MeanX           | 0.00720058    | M |
| 74 | Track_Ellipsoid_Axis_A_MeanY           | 0.00518807    | M |
| 75 | Track_Ellipsoid_Axis_A_MeanZ           | 0.00746173    | M |
| 76 | Track_Ellipsoid_Axis_B_MeanX           | 0.00934467    | M |
| 77 | Track_Ellipsoid_Axis_B_MeanY           | 0.10254       | M |
| 78 | Track_Ellipsoid_Axis_B_MeanZ           | 0.0359771     | M |
| 79 | Track_Ellipsoid_Axis_C_MeanX           | 0.0101858     | M |
| 80 | Track_Ellipsoid_Axis_C_MeanY           | 0.115632      | M |
| 81 | Track_Ellipsoid_Axis_C_MeanZ           | 0.337947      | M |
| 82 | Track_Ellipsoid_Axis_Length_A_Mean     | 0.252659      | M |
| 83 | Track_Ellipsoid_Axis_Length_B_Mean     | 0.20483       | M |
| 84 | Track_Ellipsoid_Axis_Length_C_Mean     | 0.166433      | M |
| 85 | Track_Ellipticity_Oblate_Mean          | 0.0288364     | M |
| 86 | Track_Ellipticity_Prolate_Mean         | 0.0113473     | M |
| 87 | Track_Length                           | 0.288055      | K |
| 88 | Track_Number_of_Surfaces               | 0.00284488    | - |
| 89 | Track_Number_of_Triangles              | 0.0367711     | M |
| 90 | Track_Number_of_Voxels_Img_1           | 0.0749882     | M |
| 91 | Track_Position_StartX                  | 0.0118363     | - |
| 92 | Track_Position_StartY                  | 0.0362313     | - |
| 93 | Track_Position_StartZ                  | 0.0034983     | - |
| 94 | Track_Speed_Max                        | 0.587187      | K |
| 95 | Track_Speed_Mean                       | 0.513951      | K |

|     |                                    |             |   |
|-----|------------------------------------|-------------|---|
| 96  | Track_Speed_StdDev                 | 0.582588    | K |
| 97  | Track_Speed_Variation              | 0.00325858  | K |
| 98  | Track_Sphericity_Mean              | 0.2102      | M |
| 99  | Track_Straightness                 | 0.158131    | K |
| 100 | Track_Volume_Mean                  | 0.274455    | M |
| 101 | TrackX_BoundingBoxOO_LengthX_Std   | 0.000879673 | M |
| 102 | TrackX_BoundingBoxOO_LengthX_Vrn   | 0.163121    | M |
| 103 | TrackX_BoundingBoxOO_LengthY_Std   | 0.0105878   | M |
| 104 | TrackX_BoundingBoxOO_LengthY_Vrn   | 0.222923    | M |
| 105 | TrackX_BoundingBoxOO_LengthZ_Std   | 0.00496087  | M |
| 106 | TrackX_BoundingBoxOO_LengthZ_Vrn   | 0.154153    | M |
| 107 | TrackX_Ellipsoid_Axis_Length_A_Std | 0.00203799  | M |
| 108 | TrackX_Ellipsoid_Axis_Length_A_Vrn | 0.136433    | M |
| 109 | TrackX_Ellipsoid_Axis_Length_B_Std | 0.00585157  | M |
| 110 | TrackX_Ellipsoid_Axis_Length_B_Vrn | 0.153317    | M |
| 111 | TrackX_Ellipsoid_Axis_Length_C_Std | 0.00241157  | M |
| 112 | TrackX_Ellipsoid_Axis_Length_C_Vrn | 0.0895463   | M |
| 113 | TrackX_Ellipticity_(oblate)_Std    | 0.121768    | M |
| 114 | TrackX_Ellipticity_(oblate)_Vrn    | 0.0380257   | M |
| 115 | TrackX_Ellipticity_(prolate)_Std   | 0.0962038   | M |
| 116 | TrackX_Ellipticity_(prolate)_Vrn   | 0.122993    | M |
| 117 | TrackX_Sphericity_Std              | 0.26669     | M |
| 118 | TrackX_Sphericity_Vrn              | 0.337505    | M |

### Cremaster- Full List of ACME-extracted parameters

| Variable # (after selection) | Parameter (Short name) | Parameter full name                         | ARI (Adjusted Rand Index) | Type (Track/Object) | Morpho / kinetic | Description                                                                                                                                                                                                   |
|------------------------------|------------------------|---------------------------------------------|---------------------------|---------------------|------------------|---------------------------------------------------------------------------------------------------------------------------------------------------------------------------------------------------------------|
| 1                            | total distance         | Total distance                              | 0.4084                    | T                   | K                | Indicates total distance travelled (i.e. the total length of displacements within the Track).                                                                                                                 |
| 2                            | max speed              | Maximum speed                               | 0.3739                    | T                   | K                |                                                                                                                                                                                                               |
| 3                            | mean speed             | Mean speed                                  | 0.3889                    | T                   | K                |                                                                                                                                                                                                               |
| 4                            | meander ratio          | Meander ratio                               | 0.3545                    | T                   | K                | Calculated as the total distance divided by the displacement length of the track. When the index is between 1 and 1.5 the track is sinuous, but if between 1.5 and 4, then meandering. Index of 1 (straight). |
| 5                            | tortuosity             | Tortuosity                                  | 0.3832                    | T                   | K                | Tortuosity is a property of a curve being tortuous. The inverse of meander ratio.                                                                                                                             |
| 6                            | angle vs stream        | Angle between the trajectory and the stream | 0.3677                    | T                   | K                | Angle between the trajectory (straight line that goes from the first position to the last position of the trajectory) and the bloodstream.                                                                    |
| 7                            | mean volume            | Mean volume                                 | 0.4219                    | T                   | M                |                                                                                                                                                                                                               |
| 8                            | mean surface area      | Mean surface area                           | 0.4111                    | T                   | M                |                                                                                                                                                                                                               |

|    |                      |                                                 |        |   |   |  |
|----|----------------------|-------------------------------------------------|--------|---|---|--|
| 9  | mean height          | Mean height respect to the wall                 | 0.3930 | T | M |  |
| 10 | mean max length      | Mean of the maximum length                      | 0.3685 | T | M |  |
| 11 | mean H/L ratio       | Mean of the height/length ratio                 | 0.4240 | T | M |  |
| 12 | mean sphericity      | Mean sphericity                                 | 0.3598 | T | M |  |
| 13 | mean ellip prolate   | Mean ellipticity prolate                        | 0.4376 | T | M |  |
| 14 | mean ellip oblate    | Mean ellipticity prolate                        | 0.3893 | T | M |  |
| 15 | mean length A axis   | Mean length principal axis (A)                  | 0.4401 | T | M |  |
| 16 | mean length B axis   | Mean length second principal axis (B)           | 0.3981 | T | M |  |
| 17 | mean length C axis   | Mean length third principal axis (C)            | 0.4260 | T | M |  |
| 18 | mean extent          | Mean extent                                     | 0.3448 | T | M |  |
| 19 | mean solidity        | Mean solidity                                   | 0.4012 | T | M |  |
| 20 | mean equivalent diam | Mean equivalent diameter                        | 0.4705 | T | M |  |
| 21 | volume Std           | Standard deviation of the Volume                | 0.4151 | T | M |  |
| 22 | surface area Std     | Standard deviation of the surface area          | 0.4788 | T | M |  |
| 23 | max area Std         | Standard deviation of the maximum area          | 0.3767 | T | M |  |
| 24 | max length Std       | Standard deviation of the maximum length        | 0.4406 | T | M |  |
| 25 | H/L ratio Std        | Standard deviation of the height/length ratio   | 0.3206 | T | M |  |
| 26 | sphericity Std       | Standard deviation of sphericity                | 0.2178 | T | M |  |
| 27 | ellip prolate Std    | Standard deviation of ellipticity prolate       | 0.4573 | T | M |  |
| 28 | ellip oblate Std     | Standard deviation of ellipticity oblate        | 0.4370 | T | M |  |
| 29 | length A axis Std    | Standard deviation of length principal axis (A) | 0.5391 | T | M |  |

|    |                       |                                                                    |        |   |   |                                                                                               |
|----|-----------------------|--------------------------------------------------------------------|--------|---|---|-----------------------------------------------------------------------------------------------|
| 30 | length B axis Std     | Standard deviation of length principal axis (B)                    | 0.5119 | T | M |                                                                                               |
| 31 | length C axis Std     | Standard deviation of length principal axis (C)                    | 0.4781 | T | M |                                                                                               |
| 32 | extent Std            | Standard deviation of the extent                                   | 0.4620 | T | M |                                                                                               |
| 33 | solidity Std          | Standard deviation of the solidity                                 | 0.4417 | T | M |                                                                                               |
| 34 | equivalent diam Std   | Standard deviation of the equivalent diameter                      | 0.5305 | T | M |                                                                                               |
| 35 | mean polar radius     | Mean of the polar radius                                           | 0.1925 | T | K |                                                                                               |
| 36 | mean polar angle      | Mean of the polar angle                                            | 0.3787 | T | K |                                                                                               |
| 37 | polar radius Std      | Standard deviation of the polar radius                             | 0.1094 | T | K |                                                                                               |
| 38 | polar angle Std       | Standard deviation of the polar angle                              | 0.2835 | T | K |                                                                                               |
| 39 | ori X mean            | Mean orientation respect to steam (X)                              | 0.3533 | T | K |                                                                                               |
| 40 | ori Y mean            | Mean orientation respect to steam (Y)                              | 0.3886 | T | K |                                                                                               |
| 41 | ori Z mean            | Mean orientation respect to steam (Z)                              | 0.3287 | T | K |                                                                                               |
| 42 | ori X Std             | Standard deviation of the orientation respect to steam (X)         | 0.4321 | T | K |                                                                                               |
| 43 | ori Y Std             | Standard deviation of the orientation respect to steam (Y)         | 0.5238 | T | K |                                                                                               |
| 44 | ori Z Std             | Standard deviation of the orientation respect to steam (Z)         | 0.4246 | T | K |                                                                                               |
| 45 | mean flattening       | Mean distance of the centre of neutrophil to the wall (flattening) | 0.2995 | T | M |                                                                                               |
| 46 | mean min dist to wall | Mean of the minimum distance to wall                               | 0.3522 | T | K | The mean of minimum distance of the neutrophil in each time step to the blood vessel surface. |

|    |                        |                                            |         |   |   |                                                                                                                                                                                                                                                    |
|----|------------------------|--------------------------------------------|---------|---|---|----------------------------------------------------------------------------------------------------------------------------------------------------------------------------------------------------------------------------------------------------|
| 47 | track min dist to wall | Minimum distance of the trajectory to wall | 0.00529 | T | K | The minimum distance of a trajectory to blood vessel surface.                                                                                                                                                                                      |
| 48 | mean net score         | Mean neural network score                  | 0.2261  | T | M |                                                                                                                                                                                                                                                    |
| 49 | max net score          | Maximum neural network score               | 0.2225  | T | M |                                                                                                                                                                                                                                                    |
| 50 | min net score          | Minimum neural network score               | 0.3640  | T | M |                                                                                                                                                                                                                                                    |
| 51 | network score range    | Neural network score range                 | 0.3761  | T | M |                                                                                                                                                                                                                                                    |
| 52 | volume                 | Volume                                     | 0.06198 | O | M | Number of voxels of the neutrophil.                                                                                                                                                                                                                |
| 53 | surface area           | Surface area                               | 0.07241 | O | M | Superficial area of the neutrophil in pixels.                                                                                                                                                                                                      |
| 54 | height                 | Height respect to the wall                 | 0.00595 | O | M | Height of the neutrophil respect to the vessel wall.                                                                                                                                                                                               |
| 55 | max length             | Maximum length                             | 0.02487 | O | M | Maximum width of an object                                                                                                                                                                                                                         |
| 56 | H/L ratio              | height/length ratio                        | 0.03479 | O | M | height/length ratio of a neutrophil (object)                                                                                                                                                                                                       |
| 57 | sphericity             | Sphericity                                 | 0.01640 | O | M | Sphericity measures how closely the shape of an object resembles that of a perfect sphere. Any particle which is not a sphere will have sphericity less than 1.                                                                                    |
| 58 | ellipticity prolate    | Ellipticity prolate                        | 0.01645 | O | M | An oblate spheroid is the shape of the Earth and some other planets. It is like a sphere squashed from the top so the circumference around the poles is less than the circumference around the equator. Shapes of this type are called ellipsoids. |
| 59 | ellipticity oblate     | Ellipticity oblate                         | 0.01220 | O | M | Prolate spheroids — A <i>spheroid</i> has circular symmetry. If the ellipse is rotated about its major axis, the result is a <i>prolate</i> (elongated) <i>spheroid</i> , shaped like an American football or rugby ball.                          |
| 60 | length A axis          | Length principal axis (A)                  | 0.01676 | O | M | Length of the longest principal axis of the best-fitted ellipsoid into the segmented object (neutrophil)                                                                                                                                           |
| 61 | length B axis          | Length second principal axis (B)           | 0.04391 | O | M | Length of the second principal axis of the best-fitted ellipsoid into the segmented object (neutrophil). B is perpendicular to A and C.                                                                                                            |
| 62 | length C axis          | Length third principal axis (C)            | 0.05992 | O | M | Length of the third principal axis of the best-fitted ellipsoid into the segmented object (neutrophil). C is perpendicular to A and B.                                                                                                             |
| 63 | extent                 | Extent                                     | 0.01455 | O | M | Pixel ratio between the neutrophil and the bounding box that contains it (it can be an indicator of the quality of the segmentation, since a good segmentation must be compact).                                                                   |
| 64 | solidity               | Solidity                                   | 0.01917 | O | M | Pixel ratio between the region and the smallest convex polygon that encompasses the region (as above, it can be an indicator of the compactness of the segmentation).                                                                              |
| 65 | equivalent diam        | Equivalent diameter                        | 0.06950 | O | M | The equivalent diameter is defined as the diameter of a circle with an equal aggregate sectional area, which is calculated by $d = \sqrt{2 \text{Area} / \pi}$ .                                                                                   |
| 66 | ori X stream           | Orientation respect to steam (X)           | 0.01707 | O | K | 3D orientation of the neutrophil with respect to the direction of the                                                                                                                                                                              |



|    |                      |                                                        |         |   |   |                                                                                                                                                                                                                                                                                                                                                     |
|----|----------------------|--------------------------------------------------------|---------|---|---|-----------------------------------------------------------------------------------------------------------------------------------------------------------------------------------------------------------------------------------------------------------------------------------------------------------------------------------------------------|
|    |                      |                                                        |         |   |   | bloodstream along the trajectory (X axis).                                                                                                                                                                                                                                                                                                          |
| 67 | ori Y stream         | Orientation respect to steam (Y)                       | 0.02472 | O | K | 3D orientation of the neutrophil with respect to the direction of the bloodstream along the trajectory (Y axis).                                                                                                                                                                                                                                    |
| 68 | ori Z stream         | Orientation respect to steam (Z)                       | 0.01141 | O | K | 3D orientation of the neutrophil with respect to the direction of the bloodstream along the trajectory (Z axis).                                                                                                                                                                                                                                    |
| 69 | polar radius         | Polar radius                                           | 0.03839 | O | K | 3D position of the neutrophil with respect to the cross section of the vessel in polar coordinates: distance from the center (between 0 and 1).                                                                                                                                                                                                     |
| 70 | polar angle          | Polar angle                                            | 0.02997 | O | K | 3D position of the neutrophil with respect to the cross section of the vessel in polar coordinates: angle (between 0 and 2Pi).                                                                                                                                                                                                                      |
| 71 | flattening           | Distance centre of neutrophil to the wall (flattening) | 0.00482 | O | M | Distance between the center of the neutrophil (object) and the vessel wall.                                                                                                                                                                                                                                                                         |
| 72 | min distance to wall | Minimum distance to wall                               | 0.00157 | O | K | Minimum distance between the neutrophil (object) and the vessel surface (that of the voxel closest to the vessel).                                                                                                                                                                                                                                  |
| 73 | network score        | Neural network score                                   | 0.01591 | O | M | The neural network includes a module that provides a probability value between 0 and 1 for each of the 3D regions resulting from the segmentation. This value indicates the reliability of each region based on its size and shape (for example, compact regions with a size similar to that of the neutrophils of interest will be more reliable). |

## Captions for Videos S1 to S6

**Video S1 caption. Multiphoton imaging of leukocytes in influenza-infected trachea.** Representative 3D image sequence of inflamed trachea from a CD11c<sup>YFP</sup> mouse at 3 days post-infection with PR8 influenza virus. The left panel shows raw imaging data capturing the shape and movement of DCs (red) and adoptively transferred CK6<sup>E<sub>CFP</sub></sup> neutrophils (green) within the tracheal collagen fibers (SHG, blue). The video at right shows the corresponding 3D surface reconstructions of the cells (also referred to as 'objects', grey) and their tracks (red), which combined were used for the morpho-kinetic analysis in [Figure 1B](#). Tracks only show the trajectories of the cells during the last 7 time points to avoid crowding. Scale bar, 50µm. Total elapsed time: 30 min. The video is played twice.

**Video S2 caption. Multiphoton imaging of leukocytes during ischemia-reperfusion injury.** Dynamic imaging of the ear skin of LyzM<sup>GFP</sup>; CD11c<sup>YFP</sup> mice subjected to I/R. 4D intravital images were acquired after pressing magnets were removed (4h post reperfusion). The top panel corresponds to raw images where DCs are visualized in red, neutrophils in green and macrophages in light green. SHG shown in blue corresponds to the collagen matrix. The I/R area is at the left side of the image where neutrophil density exponentially increases after reperfusion. The bottom panel shows the corresponding 3D surface reconstruction of cells ('objects', grey) and their tracks (red), which were used for the morpho-kinetic analysis represented in [Figure 1H](#). Tracks represent the trajectories of cells during the last 7 time points. Scale bar, 20µm. Total elapsed time: 2 h 55 min. The video is played twice.

**Video S3 caption. Multiphoton imaging of DCs and neutrophils during laser-burn injury.** 3D image sequences of the ear skin of LyzM<sup>GFP</sup>; CD11c<sup>YFP</sup> mice after laser-induced focal sterile injury. The video at left displays raw imaging data with DCs in red and neutrophils in green. SHG is shown in blue (collagen) and blood vessels and the burnt area are in grey (Evans blue and autofluorescence). The right panel shows the corresponding 3D surface reconstruction of cells ('objects', grey) and their tracks (red), which were used for the morpho-kinetic analysis in [Figure 1I](#). Tracks represent the trajectories of cells during the last 7 time points. Scale bar, 50µm. Total elapsed time: 2h 30 min. The video is played twice.

**Video S4 caption. Spinning-disk imaging of inflamed venules for behavioral analysis of intravascular neutrophils.** Representative 3D image sequence of an inflamed cremaster venule from a LyzM<sup>GFP</sup> mouse showing leukocytes rolling and adhering (grey) to the vessel wall (blue, CD31). The tracks of crawling neutrophils are depicted in red for a maximum period of 7 time points. The morpho-kinetic information for intravascular neutrophils was extracted from a set of similar recordings and were used for the analyses shown in [Figure 2D](#). Scale bar, 20µm. Total elapsed time: 6 min. The video is played twice.

**Video S5 caption. Three behavioral states for intravascular neutrophils within inflamed venules.** 4D image sequences of representative intravascular neutrophils (red) from behavioral groups 1-3 defined in [Figure 2E](#). Behavior 1 is associated with small, egg-shaped neutrophils sessile on the vascular wall (blue, CD31). Behavior 2 neutrophils are characterized by ameboid-shape and faster motion, with frequent changes in shape. Behavior 3 neutrophils are large and sessile, and in intimate contact with the vascular wall. Scale bar, 5µm. Total elapsed time: 6 min. The video is played twice.

**Video S6. Filtering out subcellular fragments.** Cell segmentation in the trachea imaging experiments showing DCs, neutrophils and subcellular fragments. These fragments are defined by setting a filter of 40 voxel (~90 µm<sup>3</sup>), and were not included in the behavioral analyses to avoid over-representation of "false" cells.
